# Supplementary material
Source: PubMed Central journal article supplement (PMC5879702)
Supplement: pnas.201720696SI.pdf [file pnas.201720696SI.pdf]

# Supporting Information

Gao et al. 10.1073/pnas.1720696115

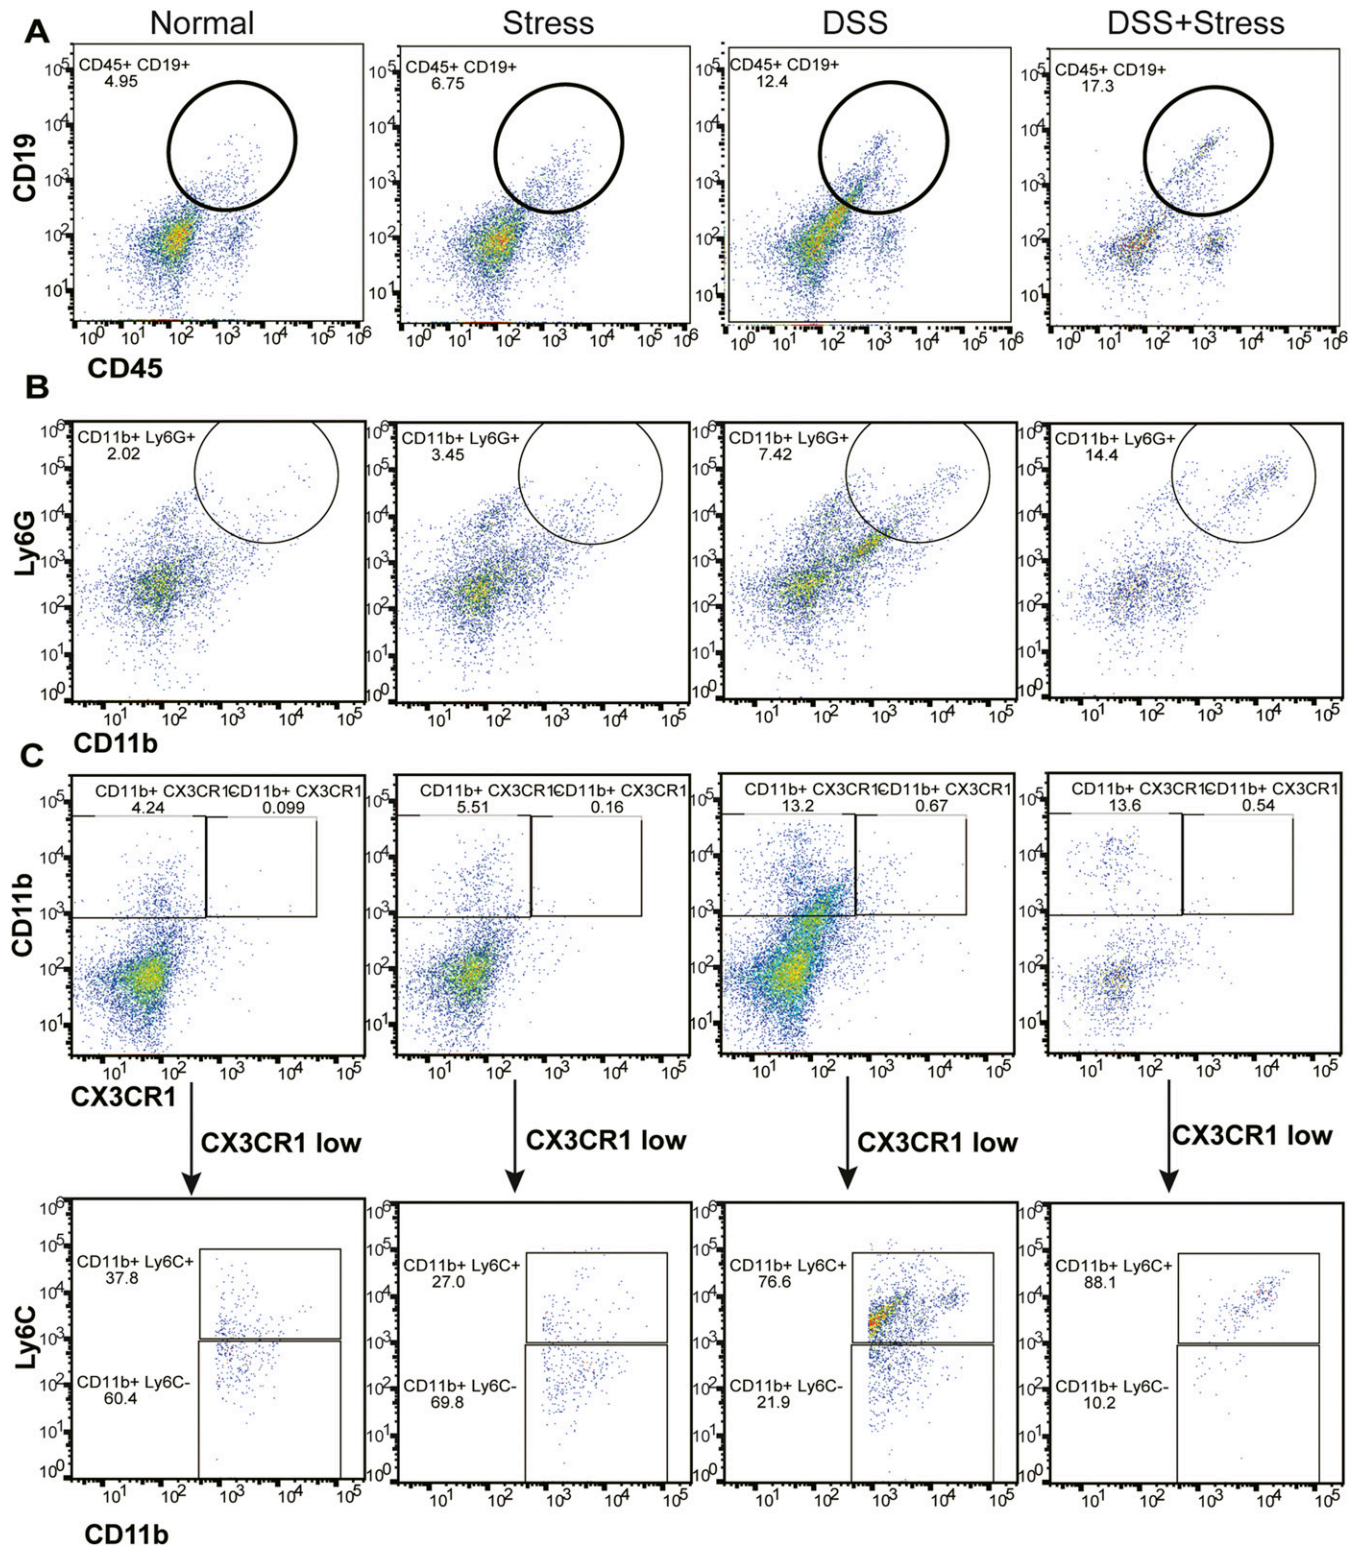

**Fig. S1.** Representative flow cytometry images in colonic lamina propria. (A) Representative flow cytometry images of B cells (CD45<sup>+</sup>, CD19<sup>+</sup>) in each group. (B) Representative flow cytometry images of NEUs (CD45<sup>+</sup>, Ly6G<sup>+</sup>) in each group. (C) Representative flow cytometry images of ly6c<sup>hi</sup> macrophages in each group.

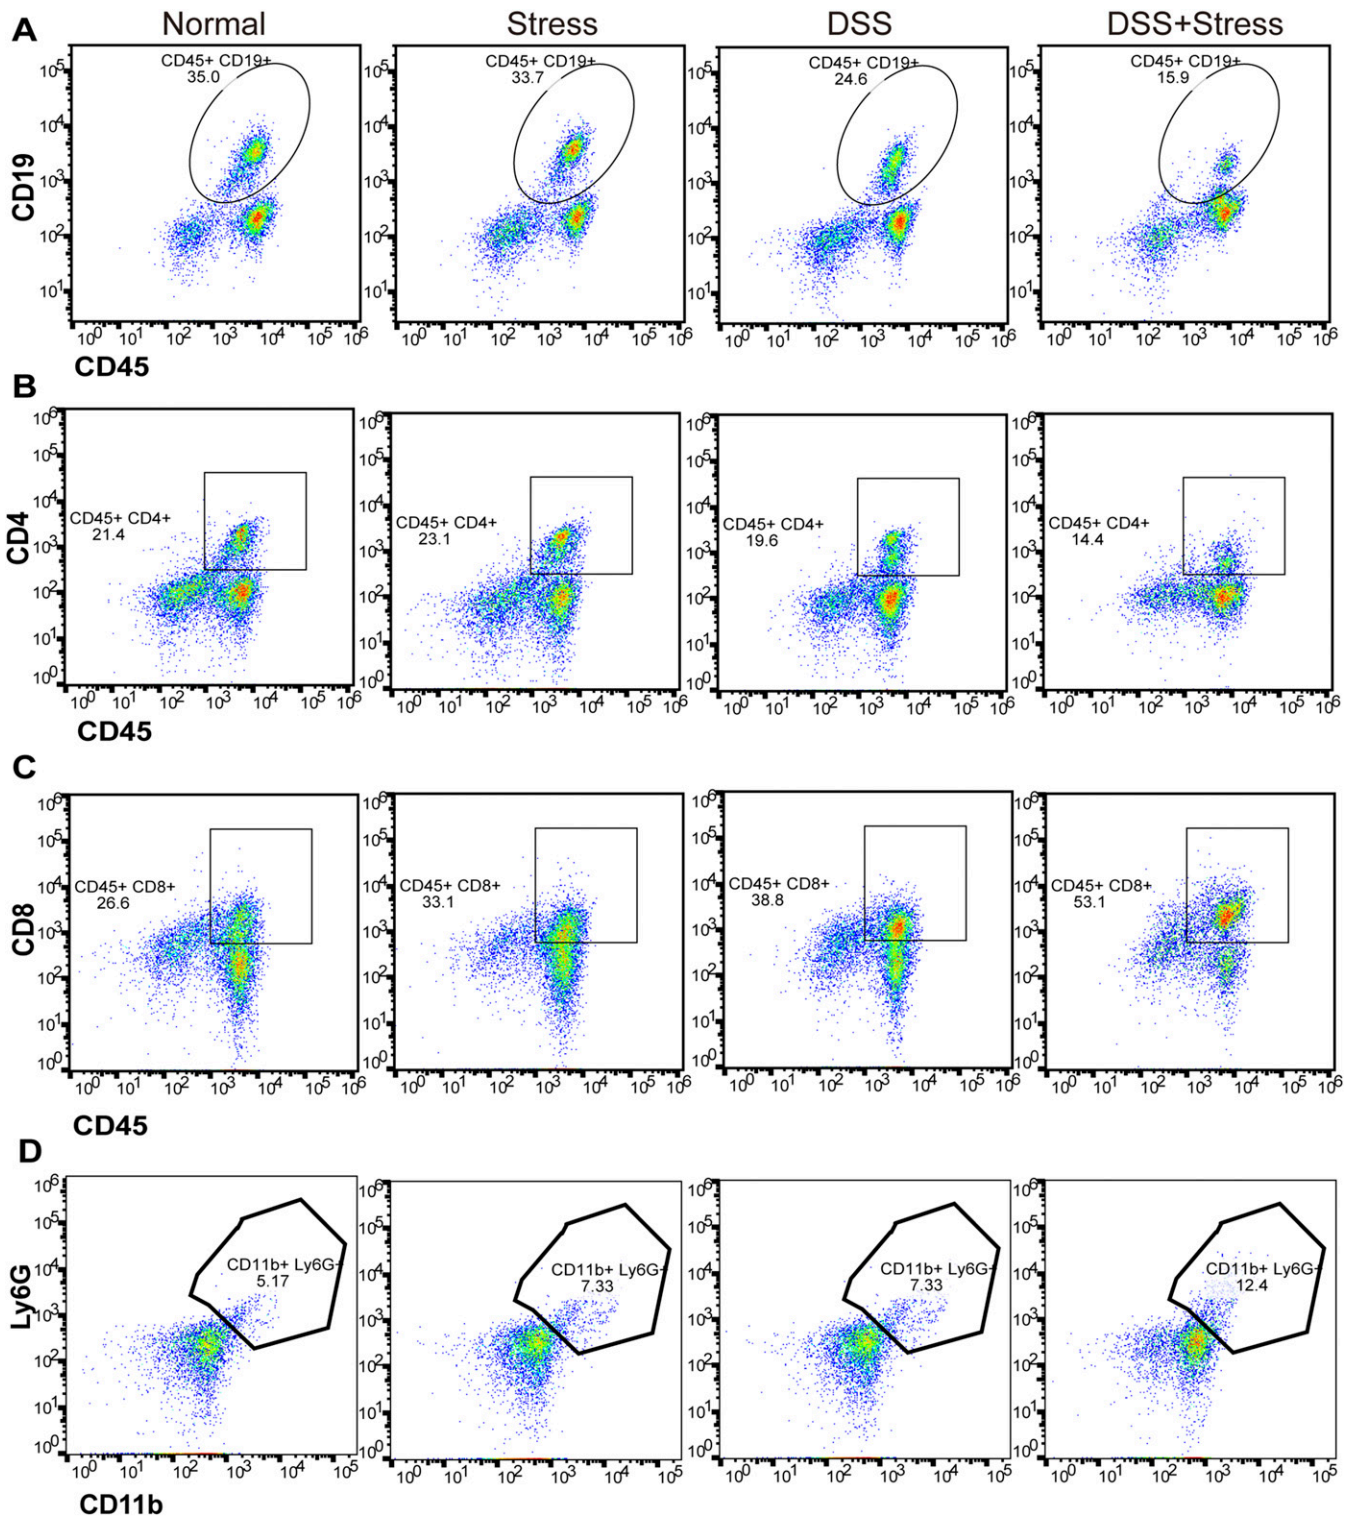

**Fig. S2.** Representative flow cytometry images in MLN. (A) Representative flow cytometry images of B cells (CD45<sup>+</sup>, CD19<sup>+</sup>) in each group. (B) Representative flow cytometry images of CD4<sup>+</sup> T cells (CD45<sup>+</sup>, CD4<sup>+</sup>) in each group. (C) Representative flow cytometry images of CD8<sup>+</sup> T cells (CD45<sup>+</sup>, CD8<sup>+</sup>) in each group. (D) Representative flow cytometry images of NEUs (CD45<sup>+</sup>, Ly6G<sup>+</sup>) in each group.

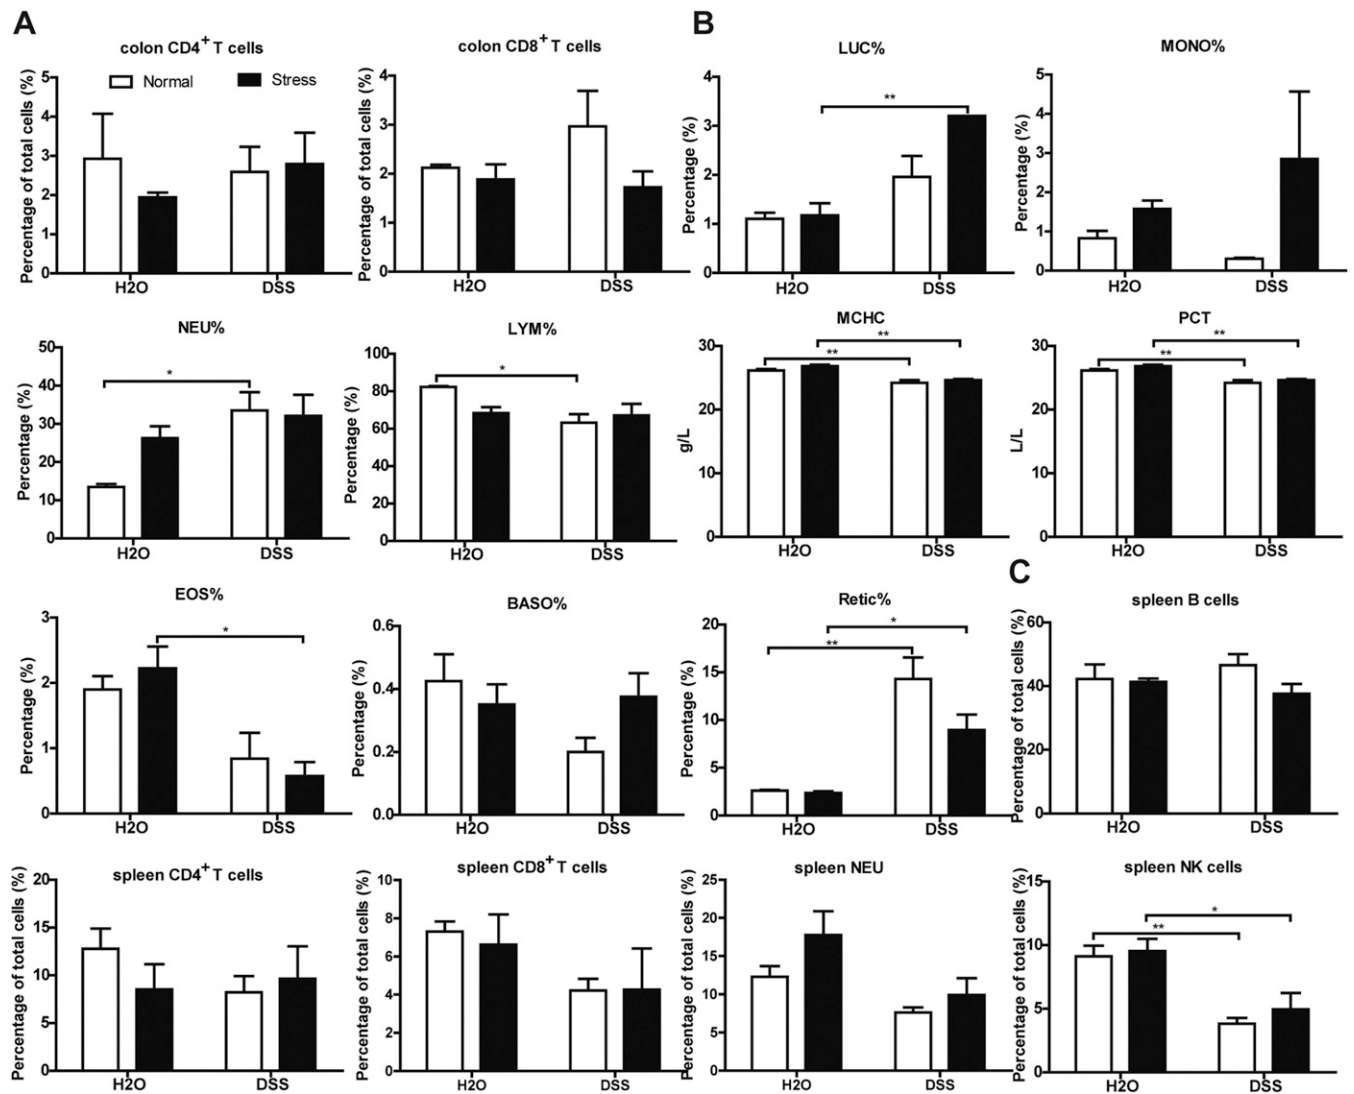

**Fig. 53.** Chronic stress disturbed the immune system. (A) Flow cytometric analysis of CD4<sup>+</sup> T (CD45<sup>+</sup>, CD4<sup>+</sup>) and CD8<sup>+</sup> T (CD45<sup>+</sup>, CD8<sup>+</sup>) cells in colonic lamina propria ( $n = 4-5$ ). (B) Percentages of LUCs, MONO, NEUs, LYM, MCHC, PCT, EOS, BASO, and Retic in the peripheral blood detected by an automated hematology analyzer (ADVIA2120; Siemens;  $n = 4-5$ ). (C) Flow cytometric analysis of B (CD45<sup>+</sup>, CD19<sup>+</sup>), CD4<sup>+</sup> T (CD45<sup>+</sup>, CD4<sup>+</sup>), CD8<sup>+</sup> T (CD45<sup>+</sup>, CD8<sup>+</sup>), NEU (CD45<sup>+</sup>, Ly6G<sup>+</sup>), and NK (CD45<sup>+</sup>, CD49b<sup>+</sup>) cells in spleen ( $n = 4-5$ ; \* $P < 0.05$  and \*\* $P < 0.01$ ). BASO, basophils; EOS, eosinophils; LYM, lymphocytotoxicity; MCHC, mean corpuscular hemoglobin concentration; MONO, mono-monocyte; PCT, platelets; Retic, reticulocyte.



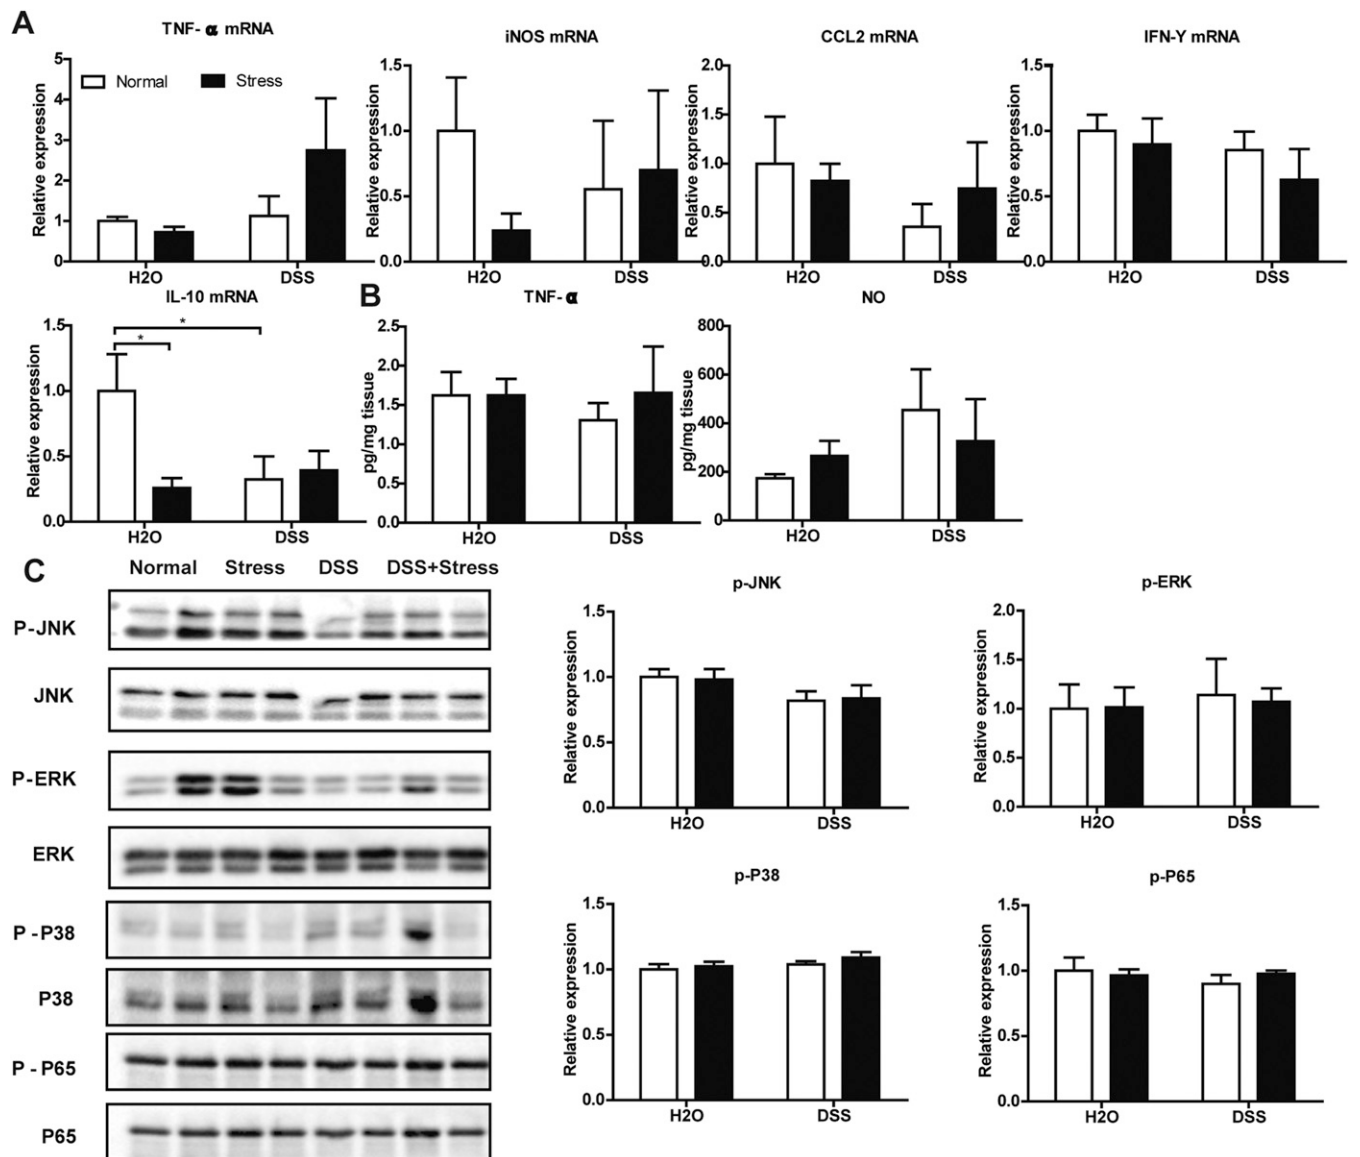

Fig. 54. Influence of chronic stress on inflammation. (A) RT-PCR results of TNF- $\alpha$ , iNOS, CCL2, IFN- $\gamma$  and IL-10 in colon. Expression data were normalized to  $\beta$ -actin. (B) ELISA results of TNF- $\alpha$  and NO in colon. (C) Western blot results of p-JNK, p-ERK, p-P38, and p-P65 in colon. Expression data were normalized to total JNK, ERK, P38, and P65 ( $n = 5$ ;  $*P < 0.05$ ).

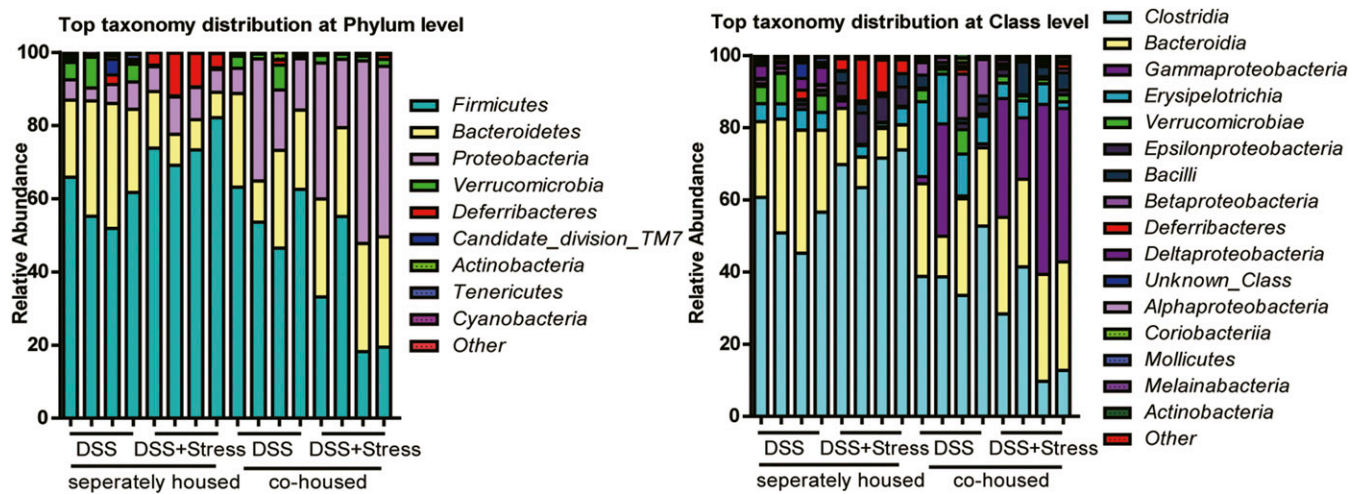

Fig. S5. Composition of microbiota at the phylum and class levels in separately housed or cohoused groups.
